# Supplementary material for: Atmospheric teleconnection processes linking winter air stagnation and haze extremes in China with regional Arctic sea ice decline
Source: Copernicus journal article supplement (doi:10.5194/acp-2019-1023), 2019-12-18
Supplement: Supplementary file 1 [file acp-2019-1023-supplement.pdf]

1 *Supplement of*  
2 **Atmospheric teleconnection processes linking winter air**  
3 **stagnation and haze extremes in China with regional Arctic sea**  
4 **ice decline**

5 Yufei Zou<sup>1</sup>, Yuhang Wang<sup>2</sup>, Zuowei Xie<sup>3</sup>, Hailong Wang<sup>1</sup>, Philip J. Rasch<sup>1</sup>

6 <sup>1</sup>Atmospheric Sciences and Global Change Division, Pacific Northwest National Laboratory,  
7 Richland, WA 99354, USA

8 <sup>2</sup>School of Earth and Atmospheric Sciences, Georgia Institute of Technology, Atlanta, GA 30332,  
9 USA

10 <sup>3</sup>International Center for Climate and Environment Sciences, Institute of Atmospheric Physics,  
11 Chinese Academy of Sciences, Beijing, 100029, China

12 *Correspondence to:* Yufei Zou (yufei.zou@pnnl.gov) and Yuhang Wang  
13 (yuhang.wang@eas.gatech.edu)

14 **Supplement**

15 **Table S1-S5**

16 **Figure S1-S8**

17 **Reference**

18 **Table S1. The 8 CMIP6 models used in this study**

| Model Name   | Modeling Center                                                                        | Institute ID        | Experiment ID                                                      | Ensemble Member |
|--------------|----------------------------------------------------------------------------------------|---------------------|--------------------------------------------------------------------|-----------------|
| CAMS-CSM1-0  | Chinese Academy of Meteorological Sciences                                             | CAMS                | Historical (Rong, 2019a)<br>+ssp585 (Rong, 2019b)                  | r1i1p1f1        |
| CESM2        | National Center for Atmospheric Research                                               | NCAR                | Historical (Danabasoglu et al., 2019) +ssp585 (Danabasoglu, 2019a) | r1i1p1f1        |
| CESM2-WACCM  | National Center for Atmospheric Research                                               | NCAR                | Historical (Danabasoglu, 2019b) +ssp585 (Danabasoglu, 2019c)       | r1i1p1f1        |
| CanESM5      | Canadian Centre for Climate Modeling and Analysis                                      | CCCma               | Historical (CCCma, 2019a)<br>+ssp585 (CCCma, 2019b)                | r1i1p1f1        |
| EC-Earth3    | The European Earth consortium                                                          | EC-Earth-Consortium | Historical (EC-Earth, 2019a)<br>+ssp585 (EC-Earth, 2019b)          | r1i1p1f1        |
| GFDL-CM4     | National Oceanic and Atmospheric Administration, Geophysical Fluid Dynamics Laboratory | NOAA-GFDL           | Historical (Guo et al., 2018a)<br>+ssp585 (Guo et al., 2018b)      | r1i1p1f1        |
| IPSL-CM6A-LR | Institute Pierre-Simon Laplace                                                         | IPSL                | Historical (Boucher, et al., 2018) +ssp585 (Boucher, et al., 2019) | r1i1p1f1        |

---

|        |                                   |       |                                                                               |          |
|--------|-----------------------------------|-------|-------------------------------------------------------------------------------|----------|
| MIROC6 | JAMSTEC, AORI,<br>NIES, and R-CCS | MIROC | Historical (Tatebe and<br>Watanabe, 2018) +ssp585<br>(Shiogama, et al., 2019) | r1i1p1f1 |
|--------|-----------------------------------|-------|-------------------------------------------------------------------------------|----------|

---

20 **Table S2. The statistical properties of the MCA\_Z500 and ECP\_PPI indices in the**  
 21 **WACCM experiments**

| Variables              | CTRL |       | SENSall |       | SENSr1 |       | SENSr2 |       | SENSr3 |       |
|------------------------|------|-------|---------|-------|--------|-------|--------|-------|--------|-------|
|                        | Z500 | PPI   | Z500    | PPI   | Z500   | PPI   | Z500   | PPI   | Z500   | PPI   |
| Mean                   | 0.0  | 0.0   | 0.01    | -0.06 | -0.07  | -0.13 | 0.01   | 0.03  | 0.01   | -0.02 |
| Std                    | 0.50 | 0.44  | 0.54    | 0.49  | 0.51   | 0.43  | 0.54   | 0.54  | 0.53   | 0.46  |
| Skewness               | 0.17 | -0.13 | -0.66   | -0.18 | -0.13  | 0.24  | 0.73   | 0.56  | -0.39  | -0.32 |
| Kurtosis               | 0.07 | -0.78 | 0.27    | 0.55  | -0.04  | -0.52 | 0.48   | -0.38 | -0.35  | -0.31 |
| p-value <sup>(a)</sup> | 0.51 | 0.21  | 0.01    | 0.21  | 1.00   | 0.39  | 0.01   | 0.01  | 0.13   | 0.17  |
| p-value <sup>(b)</sup> | –    | –     | 0.90    | 0.43  | 0.30   | 0.04  | 0.87   | 0.61  | 0.95   | 0.72  |

22 <sup>(a)</sup>: p values of the Shapiro-Wilk normality test;

23 <sup>(b)</sup>: p values of the two-sided Student's t-test for the ensemble mean comparison of the two-paired samples from  
 24 CTRL and SENS experiments;

25

26 **Table S3. The bootstrap (nboot=5000) estimates (mean  $\pm$  standard deviation) of positive**  
27 **extreme probabilities of the MCA\_Z500 and ECP\_PPI indices in the WACCM experiments**

|          | CTRL        | SENSall     | SENSr1      | SENSr2       | SENSr3      |
|----------|-------------|-------------|-------------|--------------|-------------|
| MAC_Z500 | 5% $\pm$ 0% | 4% $\pm$ 4% | 4% $\pm$ 2% | 9% $\pm$ 3%  | 6% $\pm$ 3% |
| ECP_PPI  | 5% $\pm$ 0% | 6% $\pm$ 3% | 2% $\pm$ 1% | 11% $\pm$ 3% | 6% $\pm$ 2% |

28

29

30 **Table S4. The bootstrap (nboot=5000) estimates (mean  $\pm$  standard deviation) of positive**  
31 **extreme intensities of the MCA\_Z500 and ECP\_PPI indices in the WACCM experiments**

|          | CTRL            | SENSall         | SENSr1          | SENSr2          | SENSr3          |
|----------|-----------------|-----------------|-----------------|-----------------|-----------------|
| MAC_Z500 | 1.01 $\pm$ 0.10 | 0.92 $\pm$ 0.08 | 1.00 $\pm$ 0.08 | 1.27 $\pm$ 0.08 | 1.02 $\pm$ 0.08 |
| ECP_PPI  | 0.87 $\pm$ 0.06 | 0.85 $\pm$ 0.06 | 0.86 $\pm$ 0.06 | 1.16 $\pm$ 0.06 | 0.89 $\pm$ 0.05 |

32

33 **Table S5. Changes in ensemble mean values and probabilities of positive extreme values of**  
 34 **ECP\_PPI in the CMIP6 models**

|                      | Time | NCEP  | CAMS-<br>CSM1-0 | CESM2 | CESM2-<br>WACCM | CanESM5 | EC-<br>Earth3 | GFDL-<br>CM4 | IPSL-<br>CM6A-<br>LR | MIROC6 |
|----------------------|------|-------|-----------------|-------|-----------------|---------|---------------|--------------|----------------------|--------|
| Mean                 | P1   | -0.38 | -0.36           | -0.07 | 0.03            | -0.02   | -0.27         | 0.06         | 0.12                 | 0.12   |
|                      | P2   | 0.30  | -0.16           | 0.20  | 0.36            | 0.10    | -0.21         | 0.14         | 0.08                 | 0.02   |
|                      | P3   | -     | -0.23           | 0.11  | 0.27            | 0.22    | -0.25         | 0.26         | 0.30                 | 0.00   |
| P <sub>extreme</sub> | P1   | 5%    | 5%              | 5%    | 5%              | 5%      | 5%            | 5%           | 5%                   | 5%     |
|                      | P2   | 19%   | 11%             | 11%   | 10%             | 7%      | 5%            | 6%           | 7%                   | 2%     |
|                      | P3   | -     | 13%             | 13%   | 6%              | 12%     | 2%            | 13%          | 11%                  | 4%     |

35

36

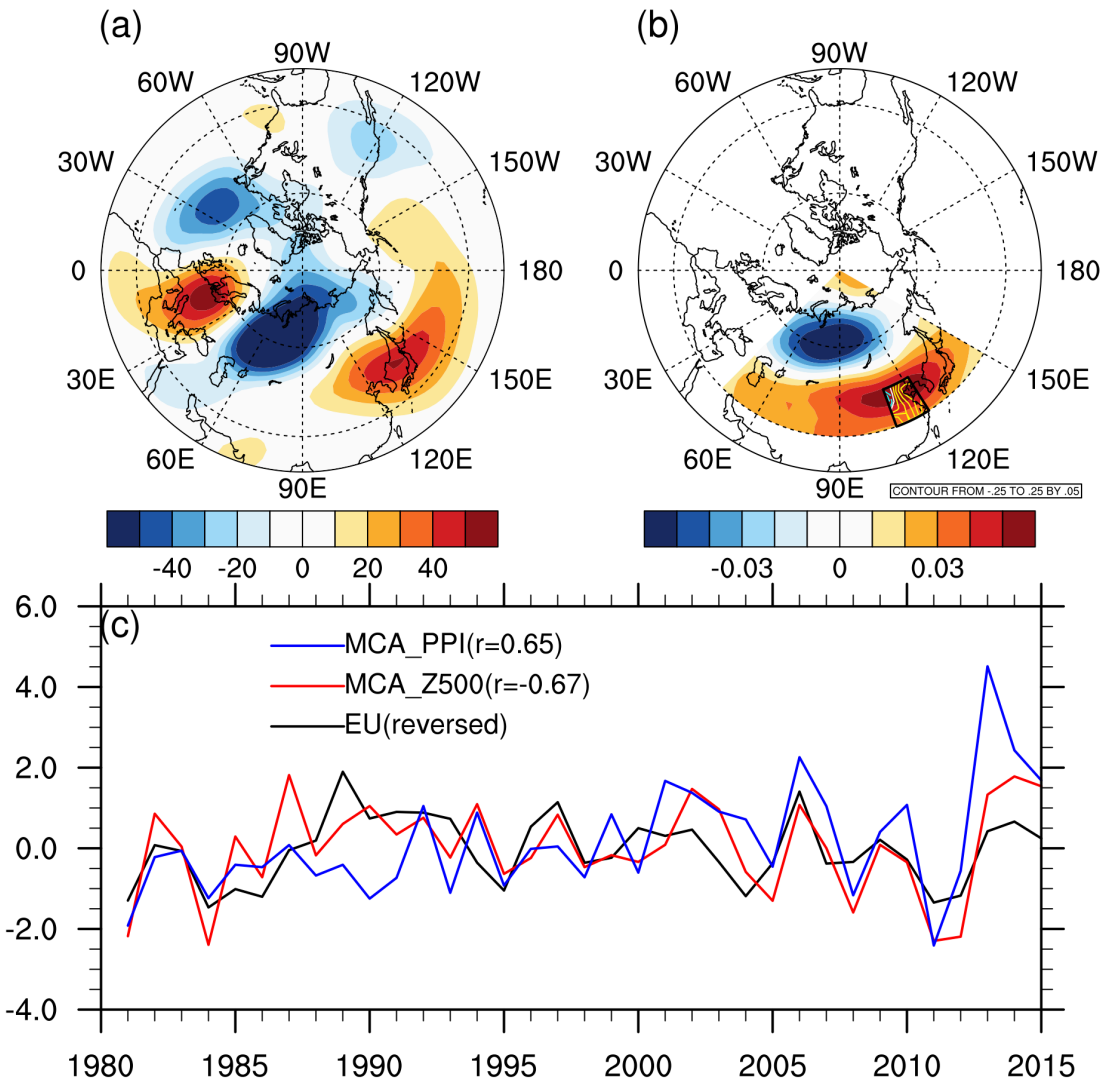

38

39

40 **Figure S1. Comparison of the circulation patterns related with regional air stagnation over**41 **ECP. (a) spatial distribution of the EU pattern in negative phase (shading) in the 500 hPa**42 **geopotential height field (unit: m); (b) spatial distribution of the first modes of MCA\_Z500**43 **in positive phase (shading) and MCA\_PPI in positive phase (contours with interval of 0.05;**44 **the yellow solid lines denote the positive contours; the white line denotes the zero contour;**45 **the cyan dashed lines denote the negative contours); the black box denotes the ECP region**46 **(112° E to 122° E, 30° N to 41° N); (c) time series of the two circulation patterns and the**47 **MCA\_PPI index in January from 1981 to 2015. The r value in the parentheses after the**48 **MCA\_PPI legend is the correlation coefficient between MCA\_PPI and MCA\_Z500. The r**49 **value in the parentheses after the MCA\_Z500 legend is the correlation coefficient between**50 **MCA\_Z500 and EU. The sign of the EU index is reversed for better comparison with the****MCA\_Z500 index.**



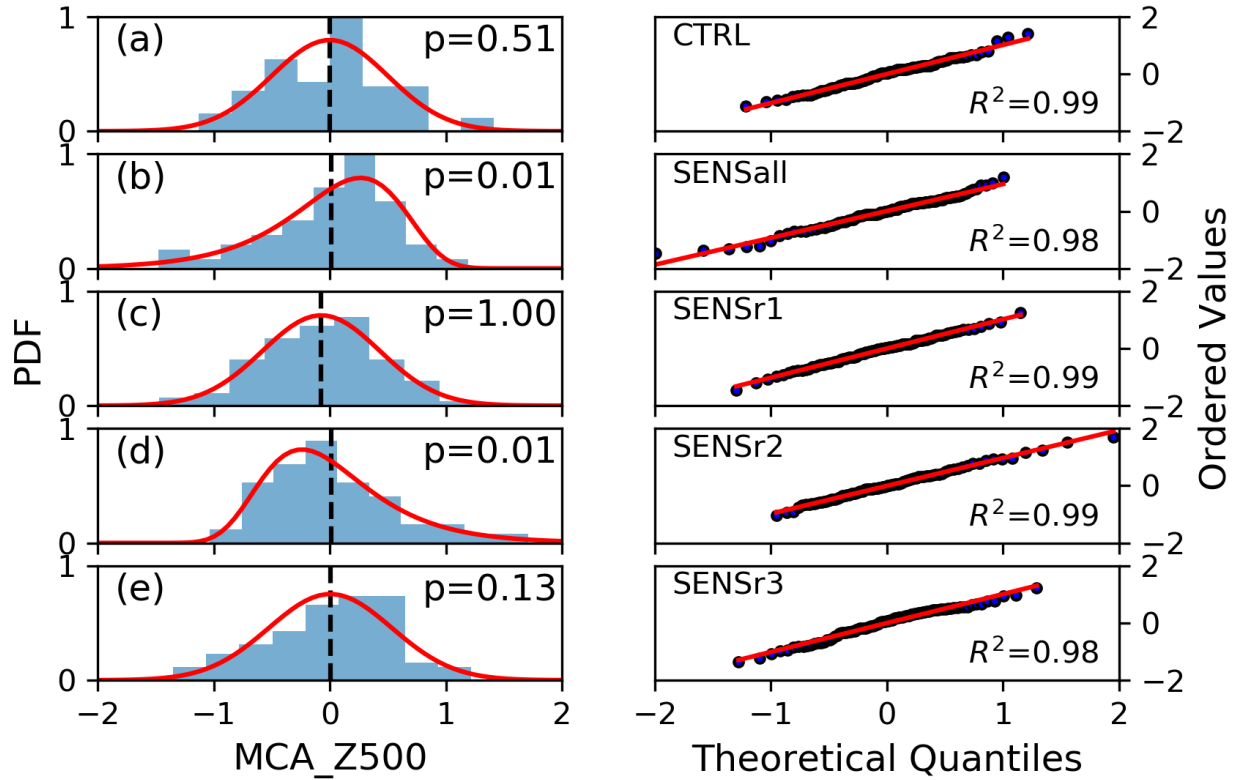

51  
52

53 **Figure S2. Evaluation of the MCA\_Z500 distribution fitting in the WACCM experiments.**  
 54 **The left panels show the comparison of the histograms and fitted PDF curves of**  
 55 **MCA\_Z500 in winter months (Dec, Jan, and Feb), and the right panels show the Q-Q plots**  
 56 **by comparing the sample quantiles from the corresponding experiments against the**  
 57 **theoretical ones of the distribution. The black dashed lines and p values in the left panel**  
 58 **denote the ensemble means and the normality test results of each experiment, and the red**  
 59 **lines and  $R^2$  values in the right panel denote the least-squares regression fits to the quantile**  
 60 **data and their corresponding goodness-of-fit. The statistical properties in Table S2 and the**  
 61 **histograms of each experiment suggest (a) a normal distribution in CTRL; (b) a left-**  
 62 **skewed distribution with “changed symmetry” in SENSa11; (c) a normal distribution with**  
 63 **“increased variability” in SENSr1; (d) a right-skewed distribution with “changed**  
 64 **symmetry” in SENSr2; (e) a normal distribution with “increased variability” in SENSr3.**

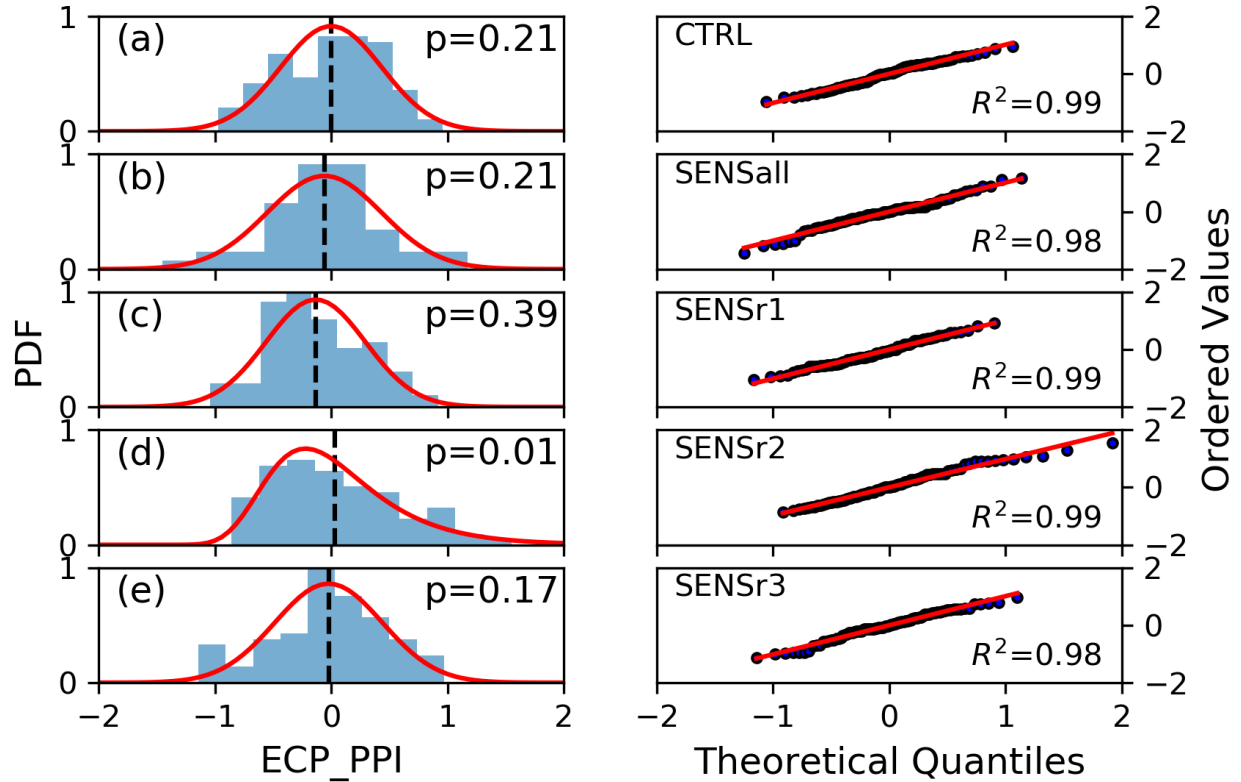

65  
66  
67  
68  
69  
70  
71  
72  
73  
74  
75  
76  
77  
78

**Figure S3. Evaluation of the ECP\_PPI distribution fitting in the WACCM experiments.** The left panels show the comparison of the histograms and fitted PDF curves of ECP\_PPI in winter months (Dec, Jan, and Feb), and the right panels show the Q-Q plots by comparing the sample quantiles from the corresponding experiments against the theoretical ones of the distribution. The black dashed lines and p values in the left panel denote the ensemble means and the normality test results of each experiment, and the red lines and  $R^2$  values in the right panel denote the least-squares regression fits to the quantile data and their corresponding goodness-of-fit. The statistical properties in Table S2 and the histograms of each experiment suggest (a) a normal distribution in CTRL; (b) a normal distribution with “increased variability” in SENSr1; (c) a normal distribution with “shifted mean” in SENSr2; (d) a right-skewed distribution with “changed symmetry” in SENSr3; (e) a normal distribution with “increased variability” in SENSr3.

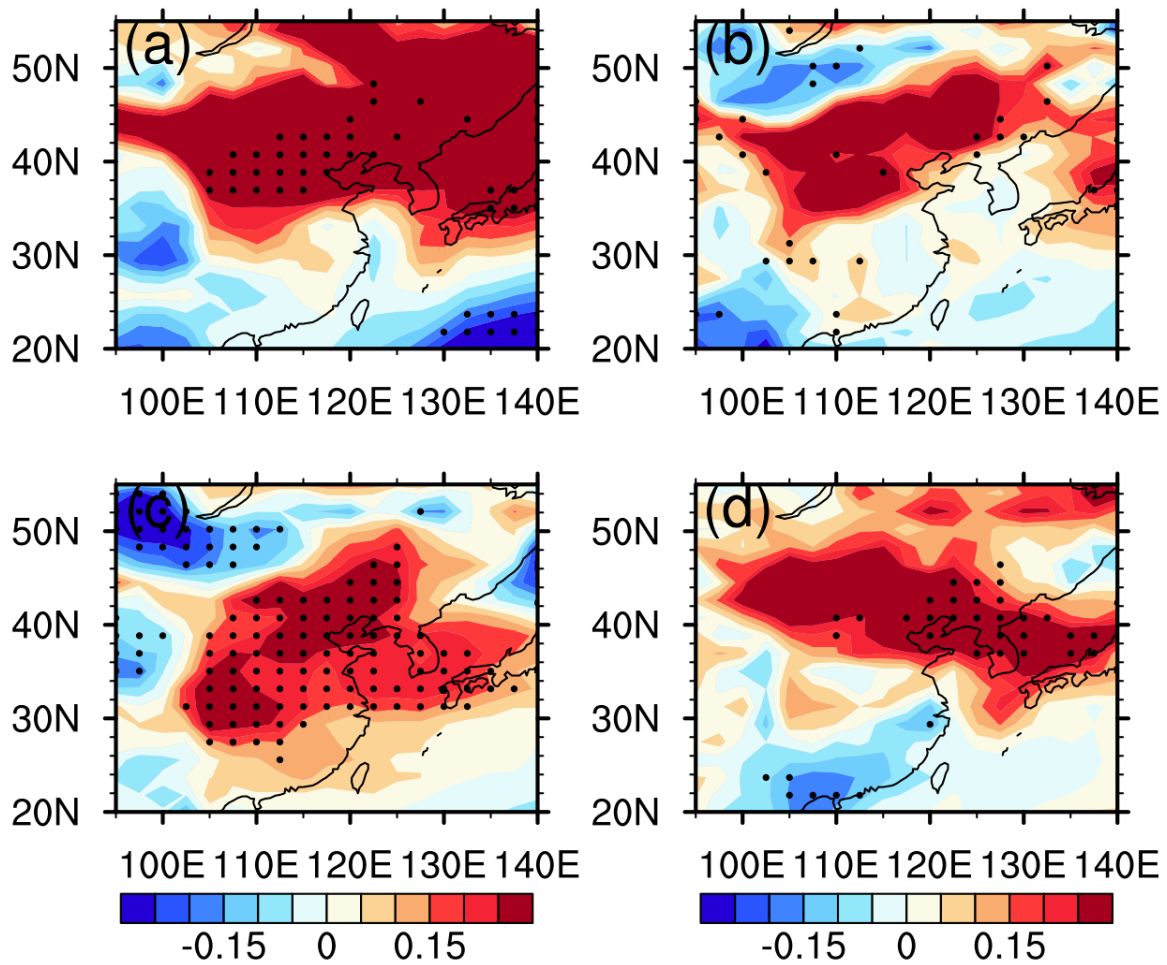

79  
 80 **Figure S4. Spatial distributions of surface PM<sub>2.5</sub> concentration relative changes (unit:**  
 81 **100%) in extreme members of each sensitivity experiment. (a) SENSall; (b) SENSr1; (c)**  
 82 **SENSr2; (d) SENSr3. The black dots denote the 0.05 significance level.**

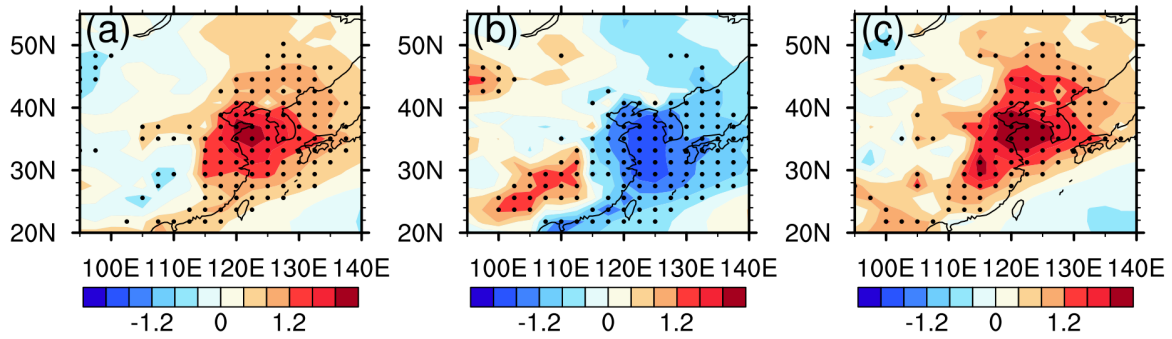

83  
84

85 **Figure S5. Spatial distributions of regional ventilation condition changes (unitless) in the**  
 86 **SENSr2 experiment. (a) PPI differences between SENSr2 extreme members and CTRL**  
 87 **ensemble mean; (b) WSI differences between SENSr2 extreme members and CTRL**  
 88 **ensemble mean; (c) ATGI differences between SENSr2 extreme members and CTRL**  
 89 **ensemble mean. The black dots denote the 0.05 significance level.**

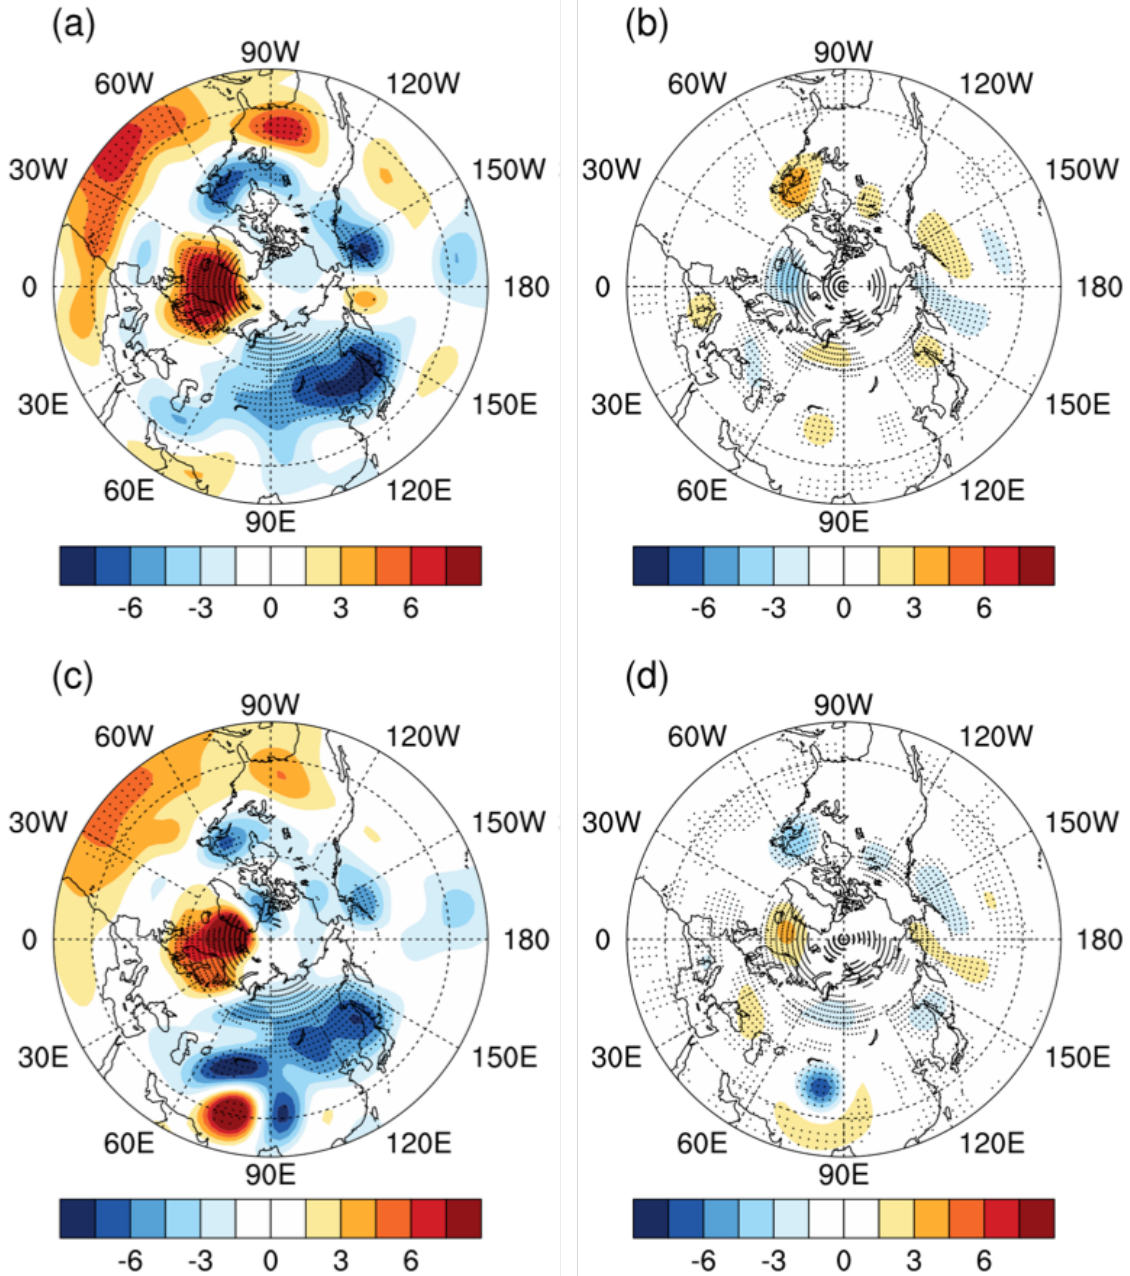

90  
 91  
 92  
 93  
 94  
 95  
 96

**Figure S6.** Comparison of geopotential height tendencies (unit: m/day) in the extreme members of WACCM SESN3 driven by (a) transient eddy vorticity forcing ( $Z_t^V$ ) in the upper troposphere at 250 hPa; (b) transient eddy heat forcing ( $Z_t^H$ ) at 250 hPa; (c) transient eddy vorticity forcing ( $Z_t^V$ ) in the lower troposphere at 850 hPa; (d) transient eddy heat forcing ( $Z_t^H$ ) at 850 hPa. The black dots denote the 0.05 significance level.

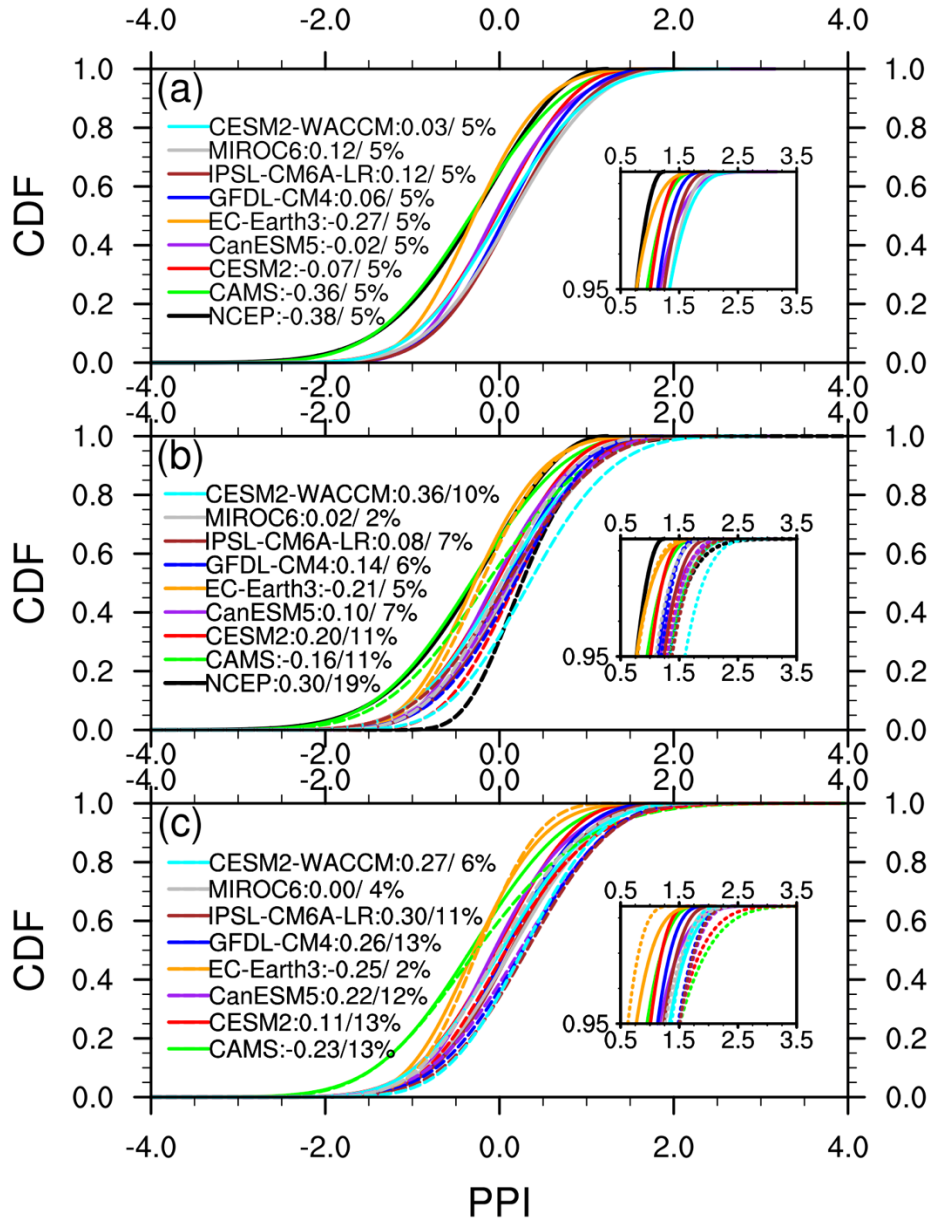

97  
 98 **Figure S7. Historical distribution and future projections (under the SSP5-8.5 scenario) of**  
 99 **regional air stagnation in winter (DJF) in NCEP reanalysis and CMIP6 models. (a) CDFs**  
 100 **of historical ECP\_PPI during the P1 period (1951-2000); (b) comparison of ECP\_PPI CDFs**  
 101 **between historical (solid lines) and near-term projections (dashed lines) during the P2**  
 102 **period (2001-2050). The NCEP ECP\_PPI data in P2 are from 2001 to 2019; (c) comparison**  
 103 **of ECP\_PPI CDFs between historical (solid lines) and long-term projections (dashed lines)**  
 104 **during the P3 period (2051-2100). In (a)-(c), the numbers and percentages after each legend**  
 105 **name denote ensemble mean values and probabilities of positive extreme values in P1-P3,**  
 106 **respectively.**

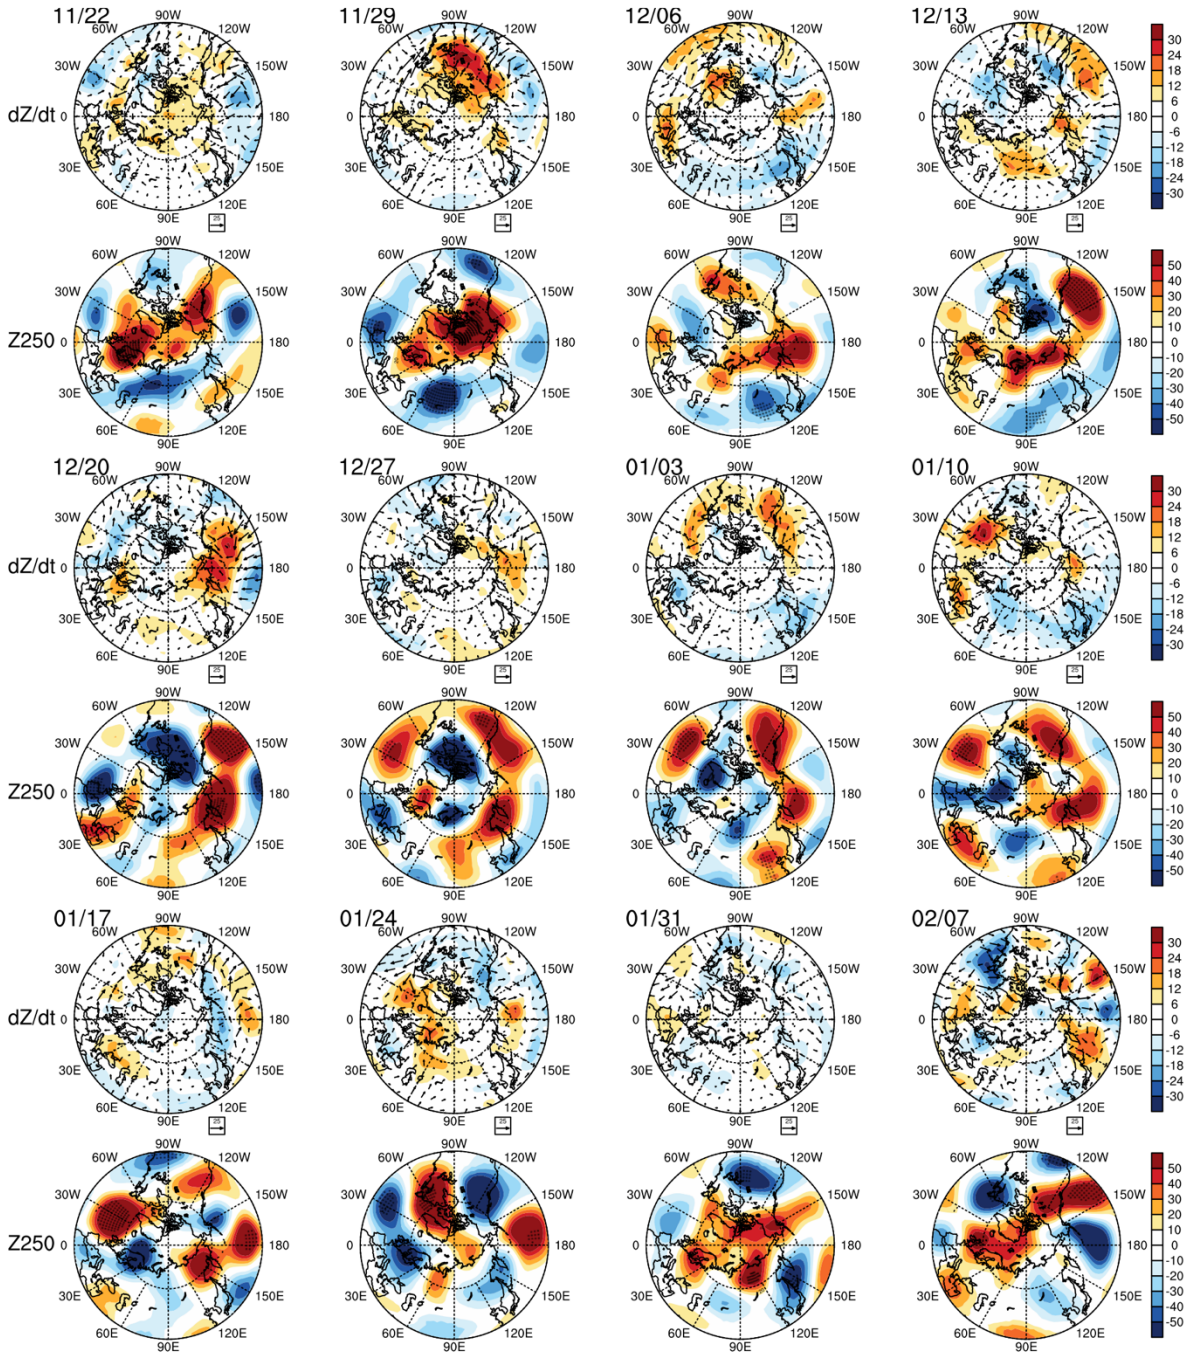

107  
 108  
 109  
 110  
 111  
 112

**Figure S8. Weekly evolution of E vectors (unit:  $m^2/s^2$ ), geopotential height tendencies (unit:  $m/day$ ), and height anomalies (unit:  $m$ ) at 250 hPa in SENSr2 ensemble mean. The dates on top left corners denote the first days of each week. The black dots in anomalous Z250 fields denote the 0.05 significance level.**

113 **References**

- 114 Boucher, O., Denvil, S., Caubel, A., et al.: IPSL-CM6A-LR model output prepared for CMIP6  
115 CMIP historical. **Version 20180803**. Earth System Grid Federation.  
116 <http://doi.org/10.22033/ESGF/CMIP6.5195>, 2018
- 117 Boucher, O., Denvil, S., Caubel, A., et al.: IPSL-CM6A-LR model output prepared for CMIP6  
118 ScenarioMIP ssp585. **Version 20190119**. Earth System Grid Federation.  
119 <http://doi.org/10.22033/ESGF/CMIP6.5271>, 2019
- 120 CCCma: CCCma CanESM5 model output prepared for CMIP6 CMIP historical. **Version**  
121 **20190429**. Earth System Grid Federation. <http://cera->  
122 [www.dkrz.de/WDCC/meta/CMIP6/CMIP6.CMIP.CCCma.CanESM5.historical](http://www.dkrz.de/WDCC/meta/CMIP6/CMIP6.CMIP.CCCma.CanESM5.historical), 2018
- 123 CCCma: CCCma CanESM5 model output prepared for CMIP6 ScenarioMIP ssp585. **Version**  
124 **20190429**. Earth System Grid Federation. <http://cera->  
125 [www.dkrz.de/WDCC/meta/CMIP6/CMIP6.ScenarioMIP.CCCma.CanESM5.ssp585](http://www.dkrz.de/WDCC/meta/CMIP6/CMIP6.ScenarioMIP.CCCma.CanESM5.ssp585),  
126 2018
- 127 Danabasoglu, G., Lawrence, D., Lindsay, K., et al.: NCAR CESM2 model output prepared for  
128 CMIP6 CMIP historical. **Version 20190308**. Earth System Grid Federation.  
129 <http://doi.org/10.22033/ESGF/CMIP6.7627>, 2019
- 130 Danabasoglu, Gokhan: NCAR CESM2 model output prepared for CMIP6 ScenarioMIP ssp585.  
131 **Version 20190730**. Earth System Grid Federation.  
132 <http://doi.org/10.22033/ESGF/CMIP6.7768>, 2019
- 133 Danabasoglu, Gokhan: NCAR CESM2-WACCM model output prepared for CMIP6 CMIP  
134 historical. **Version 20190227**. Earth System Grid Federation.  
135 <http://doi.org/10.22033/ESGF/CMIP6.10071>, 2019
- 136 Danabasoglu, Gokhan: NCAR CESM2-WACCM model output prepared for CMIP6  
137 ScenarioMIP ssp585. **Version 20190815**. Earth System Grid Federation.  
138 <http://doi.org/10.22033/ESGF/CMIP6.10115>, 2019
- 139 EC-Earth Consortium (EC-Earth): EC-Earth-Consortium EC-Earth3-Veg model output prepared  
140 for CMIP6 CMIP historical. **Version 20190605**. Earth System Grid Federation.  
141 <http://doi.org/10.22033/ESGF/CMIP6.4706>, 2019
- 142 EC-Earth Consortium (EC-Earth): EC-Earth-Consortium EC-Earth3-Veg model output prepared  
143 for CMIP6 ScenarioMIP ssp585. **Version 20190629**. Earth System Grid Federation.  
144 <http://doi.org/10.22033/ESGF/CMIP6.4914>, 2019
- 145 Guo, H., John, J.G., Blanton, C., et al.: NOAA-GFDL GFDL-CM4 model output prepared for  
146 CMIP6 CMIP historical. **Version 20180701**. Earth System Grid Federation.  
147 <http://doi.org/10.22033/ESGF/CMIP6.8594>, 2018
- 148 Guo, H., John, J.G., Blanton, C., et al.: NOAA-GFDL GFDL-CM4 model output prepared for  
149 CMIP6 ScenarioMIP ssp585. **Version 20180701**. Earth System Grid Federation.  
150 <http://doi.org/10.22033/ESGF/CMIP6.9268>, 2018
- 151 Rong, X.: CAMS CAMS\_CSM1.0 model output prepared for CMIP6 CMIP historical. **Version**  
152 **20190708**. Earth System Grid Federation. <http://doi.org/10.22033/ESGF/CMIP6.9754>,  
153 2019
- 154 Rong, X.: CAMS CAMS\_CSM1.0 model output prepared for CMIP6 ScenarioMIP ssp585.  
155 **Version 20190708**. Earth System Grid Federation.  
156 <http://doi.org/10.22033/ESGF/CMIP6.11052>, 2019



157 Shiogama, H., Abe, M., Tatebe, H., et al.: MIROC MIROC6 model output prepared for CMIP6  
158 ScenarioMIP ssp585. *Version 20190627*. Earth System Grid Federation.  
159 <http://doi.org/10.22033/ESGF/CMIP6.5771>, 2019  
160 Tatebe, H. and Watanabe, M.: MIROC MIROC6 model output prepared for CMIP6 CMIP  
161 historical. *Version 20181212*. Earth System Grid Federation.  
162 <http://doi.org/10.22033/ESGF/CMIP6.5603>, 2018
